# Supplementary material
Source: PubMed Central journal article supplement (PMC10167550)
Supplement: NIHMS1876486-supplement-Supplemental_Appendix.pdf [file NIHMS1876486-supplement-Supplemental_Appendix.pdf]

# GRADUATE MEDICAL EDUCATION

[School of Medicine](#) > [Graduate Medical Education](#) > Professionalism Form

## Professionalism Form

### Explanation

Physicians in training must be held to a high standard of professionalism in all areas of their lives. These standards are not intuitive, and must be taught and reinforced both by formal education and by constructive formative feedback. If you have witnessed a resident or fellow displaying either a lapse in professionalism or exemplary professionalism, please complete the information below and provide us with the details. Help us to improve our working and learning environment.

### I would like to report an episode of resident physician \*

- Exemplary Professionalism.
- Lack of Professionalism.

### Please describe the details of the incident. \*

The email field is now mandatory. These reports come directly to the GME Office, and your identity will be protected, if that is your choice. Please indicate your preference by making your choice below your email address. If you do not indicate a preference, your email address will be shared with the investigators.

### EMAIL ADDRESS IS MANDATORY IN ORDER TO SUBMIT THIS REPORT TO THE GME OFFICE FOR INVESTIGATION: \*

### Select a Choice

- Please keep my identity confidential
- My email address may be shared with the investigators

Submit
